# Supplementary material for: Genetic Differences in Transcript Responses to Low-Dose Ionizing Radiation Identify Tissue Functions Associated with Breast Cancer Susceptibility
Source: PLOS journal article supplement (doi:10.1371/journal.pone.0045394), 2012-10-15

Table S5. Canonical pathways significantly modulated after fractionated low or high dose exposures in the mammary gland of BALB/c or C57Bl/6.

**EARLY (4 hr) RESPONSE**

|                                                                              | BALB/c |   | C57Bl/6 |   |
|------------------------------------------------------------------------------|--------|---|---------|---|
|                                                                              | L      | H | L       | H |
| p53 Signaling                                                                |        | ■ |         | ■ |
| Cell Cycle: G2/M DNA Damage Checkpoint Regulation                            |        | ■ |         | ■ |
| Cdc42 Signaling                                                              |        | ■ |         | ■ |
| Cell Cycle: G1/S Checkpoint Regulation                                       |        | ■ |         | ■ |
| Primary Immunodeficiency Signaling                                           | ■      |   | ■       |   |
| Production of Nitric Oxide and Reactive Oxygen Species in Macrophages        | ■      |   | ■       |   |
| TREM1 Signaling                                                              | ■      |   | ■       |   |
| Leukocyte Extravasation Signaling                                            | ■      |   | ■       |   |
| IL-2 Signaling                                                               | ■      |   | ■       |   |
| Role of Pattern Recognition Receptors in Recognition of Bacteria and Viruses | ■      |   | ■       |   |
| Natural Killer Cell Signaling                                                | ■      |   | ■       |   |
| GM-CSF Signaling                                                             | ■      |   | ■       |   |
| Altered T Cell and B Cell Signaling in Rheumatoid Arthritis                  | ■      | ■ | ■       | ■ |
| B Cell Development                                                           | ■      | ■ | ■       | ■ |
| Calcium-induced T Lymphocyte Apoptosis                                       | ■      | ■ | ■       | ■ |
| CTLA4 Signaling in Cytotoxic T Lymphocytes                                   | ■      | ■ | ■       | ■ |
| Cytotoxic T Lymphocyte-mediated Apoptosis of Target Cells                    | ■      | ■ | ■       | ■ |
| Allograft Rejection Signaling                                                | ■      | ■ | ■       | ■ |
| Autoimmune Thyroid Disease Signaling                                         | ■      | ■ | ■       | ■ |
| Graft-versus-Host Disease Signaling                                          | ■      | ■ | ■       | ■ |
| Nur77 Signaling in T Lymphocytes                                             | ■      | ■ | ■       | ■ |
| Antiproliferative Role of TOB in T Cell Signaling                            | ■      | ■ | ■       | ■ |
| OX40 Signaling Pathway                                                       | ■      | ■ | ■       | ■ |
| IL-4 Signaling                                                               | ■      | ■ | ■       | ■ |
| Antigen Presentation Pathway                                                 | ■      | ■ | ■       | ■ |
| Interferon Signaling                                                         | ■      | ■ | ■       | ■ |
| Activation of IRF by Cytosolic Pattern Recognition Receptors                 | ■      | ■ | ■       | ■ |
| Chemokine Signaling                                                          | ■      | ■ | ■       | ■ |
| LPS-stimulated MAPK Signaling                                                | ■      | ■ | ■       | ■ |
| CCR5 Signaling in Macrophages                                                | ■      | ■ | ■       | ■ |
| T Helper Cell Differentiation                                                | ■      | ■ | ■       | ■ |
| Toll-like Receptor Signaling                                                 | ■      | ■ | ■       | ■ |
| B Cell Receptor Signaling                                                    | ■      | ■ | ■       | ■ |
| CD28 Signaling in T Helper Cells                                             | ■      | ■ | ■       | ■ |
| Biosynthesis of Steroids                                                     | ■      | ■ | ■       | ■ |
| Glutathione Metabolism                                                       | ■      | ■ | ■       | ■ |
| Methionine Metabolism                                                        | ■      | ■ | ■       | ■ |
| Nicotinate and Nicotinamide Metabolism                                       | ■      | ■ | ■       | ■ |
| Prolactin Signaling                                                          | ■      | ■ | ■       | ■ |
| Coagulation System                                                           | ■      | ■ | ■       | ■ |
| Caveolar-mediated Endocytosis Signaling                                      | ■      | ■ | ■       | ■ |
| Oncostatin M Signaling                                                       | ■      | ■ | ■       | ■ |
| Rac Signaling                                                                | ■      | ■ | ■       | ■ |
| Extrinsic Prothrombin Activation Pathway                                     | ■      | ■ | ■       | ■ |
| Integrin Signaling                                                           | ■      | ■ | ■       | ■ |

Hepatic Fibrosis / Hepatic Stellate Cell Activation  
 DNA Methylation and Transcriptional Repression Signaling  
 HER-2 Signaling in Breast Cancer  
 Aryl Hydrocarbon Receptor Signaling  
 VDR/RXR Activation  
 Glioblastoma Multiforme Signaling  
 LXR/RXR Activation  
 Role of Lipids/Lipid Rafts in the Pathogenesis of Influenza  
 Thrombopoietin Signaling  
 Docosahexaenoic Acid (DHA) Signaling  
 Molecular Mechanisms of Cancer  
 Wnt/b-catenin Signaling  
 14-3-3-mediated Signaling  
 RAR Activation  
 HGF Signaling  
 Type I Diabetes Mellitus Signaling  
 Glioma Signaling

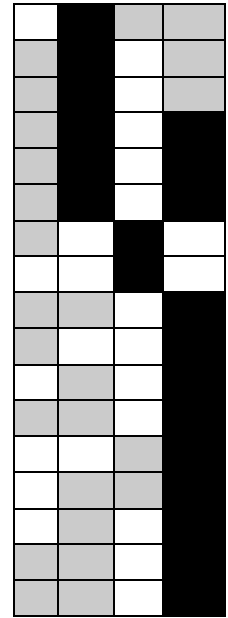

**1-MONTH RESPONSE**

| BALB/c |       | C57BL/6 |       |
|--------|-------|---------|-------|
| L      | H     | L       | H     |
| Grey   | Grey  | Black   | White |
| Grey   | Grey  | Black   | White |
| Black  | White | Grey    | White |
| Grey   | Grey  | Grey    | Grey  |
| Grey   | Grey  | Grey    | Black |

ATM Signaling  
 Role of CHK Proteins in Cell Cycle Checkpoint Control  
 Pyrimidine Metabolism  
 Cell Cycle: G1/S Checkpoint Regulation  
 p53 Signaling

IL-12 Signaling and Production in Macrophages  
 LPS-stimulated MAPK Signaling  
 IL-22 Signaling  
 IL-3 Signaling  
 LPS/IL-1 Mediated Inhibition of RXR Function  
 GM-CSF Signaling  
 TNFR1 Signaling

|       |       |       |       |
|-------|-------|-------|-------|
| White | Grey  | White | Black |
| White | Grey  | White | Black |
| Grey  | White | White | Black |
| Grey  | Grey  | White | Black |
| Grey  | White | White | Black |
| Black | White | White | Grey  |
| Grey  | Black | White | White |

Nitrogen Metabolism  
 Pantothenate and CoA Biosynthesis  
 Glycolysis/Gluconeogenesis  
 Ascorbate and Aldarate Metabolism  
 Riboflavin Metabolism  
 Starch and Sucrose Metabolism  
 Glycerolipid Metabolism  
 Glycerophospholipid Metabolism  
 Nicotinate and Nicotinamide Metabolism  
 Metabolism of Xenobiotics by Cytochrome P450

|       |       |       |       |
|-------|-------|-------|-------|
| Black | White | White | Grey  |
| White | White | Black | Black |
| White | Grey  | Grey  | Black |
| White | Grey  | White | Black |
| Grey  | White | White | Black |
| White | White | Grey  | Black |
| White | White | Grey  | Black |
| Grey  | Grey  | White | Black |
| Grey  | White | White | Black |
| White | White | White | Black |

PDGF Signaling  
 Coagulation System  
 Oncostatin M Signaling  
 Small Cell Lung Cancer Signaling  
 Pancreatic Adenocarcinoma Signaling  
 Chronic Myeloid Leukemia Signaling  
 Bladder Cancer Signaling

|       |       |       |       |
|-------|-------|-------|-------|
| Black | White | White | Grey  |
| Black | Grey  | White | Grey  |
| Black | Grey  | Grey  | Grey  |
| Black | White | White | White |
| Black | Grey  | White | Grey  |
| Black | White | White | White |
| Black | Grey  | White | Grey  |

Molecular Mechanisms of Cancer  
 Integrin Signaling  
 PAK Signaling  
 Agrin Interactions at Neuromuscular Junction  
 Tight Junction Signaling  
 Wnt/b-catenin Signaling  
 Basal Cell Carcinoma Signaling  
 Hepatic Fibrosis / Hepatic Stellate Cell Activation  
 Aryl Hydrocarbon Receptor Signaling  
 Human Embryonic Stem Cell Pluripotency  
 HMGB1 Signaling  
 TGF- $\beta$  Signaling  
 Circadian Rhythm Signaling  
 RAR Activation  
 Growth Hormone Signaling  
 Type II Diabetes Mellitus Signaling  
 Factors Promoting Cardiogenesis in Vertebrates  
 Bile Acid Biosynthesis  
 Neuregulin Signaling

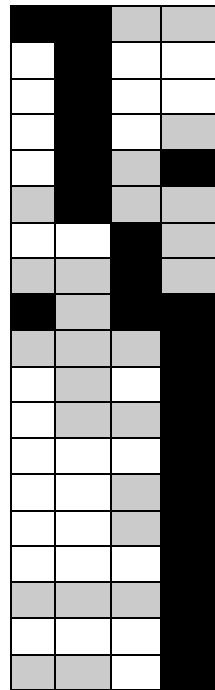

Supplement: S9 (10.1371/journal.pone.0045394.s009) [file journal.pone.0045394.s009]
