# Supplementary material for: Genetic Differences in Transcript Responses to Low-Dose Ionizing Radiation Identify Tissue Functions Associated with Breast Cancer Susceptibility
Source: PLOS journal article supplement (doi:10.1371/journal.pone.0045394), 2012-10-15
Supplement: S5 (10.1371/journal.pone.0045394.s005) [file journal.pone.0045394.s005]

Table S1. Baseline levels of micronucleated reticulocytes (RET) and normochromatic erythrocytes (NCE) are significantly higher in BALB/c compared to C57BL/6 mice.

|                                       | <b>Time<sup>b</sup></b> | <b>C57BL/6</b> | <b>BALB/c</b> | <b>p-value</b> |
|---------------------------------------|-------------------------|----------------|---------------|----------------|
| <b>Micronucleated RET<sup>a</sup></b> | -1 day                  | 0.27 ± 0.03    | 0.33 ± 0.05   |                |
|                                       | 6 days                  | 0.22 ± 0.02    | 0.34 ± 0.05   |                |
|                                       | 28 days                 | 0.25 ± 0.05    | 0.37 ± 0.08   |                |
|                                       | <i>average</i>          | 0.25           | 0.34          | <0.0001        |
|                                       |                         |                |               |                |
| <b>Micronucleated NCE<sup>a</sup></b> | -1 day                  | 0.14 ± 0.01    | 0.23 ± 0.02   |                |
|                                       | 6 days                  | 0.14 ± 0.01    | 0.23 ± 0.02   |                |
|                                       | 28 days                 | 0.13 ± 0.00    | 0.20 ± 0.01   |                |
|                                       | <i>average</i>          | 0.14           | 0.22          | <0.0001        |

<sup>a</sup>Percent ± standard deviation

<sup>b</sup>Time in relation to 4<sup>th</sup> sham
